# Supplementary material
Source: PubMed Central journal article supplement (PMC7596736)
Supplement: aim-olf-L201292-L20-1292_Supplement.pdf [file aim-olf-L201292-L20-1292_Supplement.pdf]

## Supplementary Material\*

Chou R, Dana T, Jungbauer R, et al. Update alert 3: masks for prevention of respiratory virus infections, including SARS-CoV-2, in health care and community settings. *Ann Intern Med.* 27 October 2020. [Epub ahead of print]. doi:10.7326/L20-1292

*Supplement Table 1.* Study characteristics of observational studies of mask use – Update Alert #3

*Supplement Table 2.* Mask use and risk for SARS-CoV-2 infection – Update Alert #3

*Supplement Table 3.* Quality assessment of new observational studies of mask use – Update Alert #3

*Supplement Table 4.* Masks for prevention of respiratory virus infections evidence map – Update Alert #3

### *References*

\*This supplementary material was provided by the authors to give readers further details on their article. The material was reviewed but not copyedited.

**Supplement Table 1. Study characteristics of observational studies of mask use – Update Alert #3**

| <b>Author, year<br/>Country<br/>Study<br/>design</b>            | <b>Inclusion criteria</b>                                             | <b>Sample size</b>                                           | <b>Age</b>            | <b>Female (%)</b> | <b>Definition of infection</b> |
|-----------------------------------------------------------------|-----------------------------------------------------------------------|--------------------------------------------------------------|-----------------------|-------------------|--------------------------------|
| <b><i>Community setting</i></b>                                 |                                                                       |                                                              |                       |                   |                                |
| Doung-Ngern et al, 2020 (2)<br><br>Thailand<br><br>Case-control | Asymptomatic subjects who had contact with a COVID-19 infected person | 211 cases and 839 controls                                   | Median 38 years       | 45%               | SARS-CoV-2 infection (PCR)     |
| <b><i>Healthcare setting</i></b>                                |                                                                       |                                                              |                       |                   |                                |
| Khalil et al, 2020 (3)<br><br>Bangladesh<br><br>Case-control    | Hospital physicians                                                   | 98 COVID-19 positive cases and 92 COVID-19 negative controls | Mean 33 years (cases) | 22% (cases)       | COVID-19 (positive PCR)        |
| Piapan et al, 2020 (4)<br><br>Italy<br><br>Retrospective cohort | HCWs with known COVID-19 exposure                                     | 903 HCWs                                                     | Mean 45 years         | 71%               | SARS-CoV-2 infection (PCR)     |

**Supplement Table 2. Mask use and risk for SARS-CoV-2 infection – Update Alert #3**

| Author, Year (Reference)    | Mask Use Versus Nonuse                                                                                                                                                                                                                    | Comparison of Mask Types                                                                                                                             | Consistency of Mask Use                                                                                                                                                                           | Multiple Mask Layers Versus Single Layer |
|-----------------------------|-------------------------------------------------------------------------------------------------------------------------------------------------------------------------------------------------------------------------------------------|------------------------------------------------------------------------------------------------------------------------------------------------------|---------------------------------------------------------------------------------------------------------------------------------------------------------------------------------------------------|------------------------------------------|
| <b>Community setting</b>    |                                                                                                                                                                                                                                           |                                                                                                                                                      |                                                                                                                                                                                                   |                                          |
| Doung-Ngern et al, 2020 (2) | <p>Surgical (medical) mask vs. no mask: adjusted OR 0.25 (95% CI 0.12 to 0.53)</p> <p>Cloth (nonmedical) mask vs. no mask: adjusted OR 0.78 (95% CI 0.32 to 1.90)</p> <p>Any mask vs. no mask: adjusted OR 0.46 (95% CI 0.13 to 1.64)</p> | <p>Surgical (medical) mask vs. cloth (nonmedical) mask: OR 1.06 (95% CI 0.63 to 1.79)*</p> <p>Mask type and risk of SARS-CoV-2 infection: p=0.54</p> | <p>Always wearing a mask vs. not wearing a mask: <b>adjusted OR 0.23 (95% CI 0.09 to 0.60)</b></p> <p>Sometimes wearing a mask vs. not wearing a mask: adjusted OR 0.87 (95% CI 0.41 to 1.84)</p> | --                                       |
| <b>Healthcare setting</b>   |                                                                                                                                                                                                                                           |                                                                                                                                                      |                                                                                                                                                                                                   |                                          |
| Khalil et al, 2020 (3)      | <p>Medical/surgical mask vs. no mask: adjusted OR 1.40 (0.30-6.42)</p> <p>N95 mask vs. no mask during aerosol generating procedure: <b>adjusted OR 0.37 (95% CI 0.16 to 0.87)</b></p>                                                     | --                                                                                                                                                   | --                                                                                                                                                                                                | --                                       |
| Piapan et al, 2020 (4)      | FFP2-3 or surgical mask vs. no mask: adjusted OR 1.6 (0.9-2.9)                                                                                                                                                                            | FFP2 (N95 equivalent) mask vs. surgical mask: <b>adjusted OR 7.1 (3.0-16.7)</b>                                                                      | --                                                                                                                                                                                                | --                                       |

\*Unadjusted OR calculated based on available data

**Supplement Table 3. Quality assessment of new observational studies of mask use – Update Alert #3**

| <b>Author,<br/>year<br/>Country</b> | <b>Did the study attempt to enroll all (or a random sample of) patients meeting inclusion criteria (inception cohort)?</b> | <b>Did the study use accurate methods for ascertaining exposures and potential confounders?</b> | <b>Were outcome assessors and/or data analysts blinded to exposure being studied?</b> | <b>Did the article report attrition or missing data?</b> | <b>Is there high attrition or missing data?</b> | <b>Were outcomes pre-specified and defined, and ascertained using accurate methods?</b> | <b>Other sources of potential bias</b> | <b>Quality rating</b> |
|-------------------------------------|----------------------------------------------------------------------------------------------------------------------------|-------------------------------------------------------------------------------------------------|---------------------------------------------------------------------------------------|----------------------------------------------------------|-------------------------------------------------|-----------------------------------------------------------------------------------------|----------------------------------------|-----------------------|
| <b><i>Community setting</i></b>     |                                                                                                                            |                                                                                                 |                                                                                       |                                                          |                                                 |                                                                                         |                                        |                       |
| Doung-Ngern et al, 2020 (2)         | Yes                                                                                                                        | No (potential recall bias)                                                                      | Unclear                                                                               | No                                                       | Yes                                             | Yes                                                                                     | Potential recall bias                  | Poor                  |
| <b><i>Healthcare setting</i></b>    |                                                                                                                            |                                                                                                 |                                                                                       |                                                          |                                                 |                                                                                         |                                        |                       |
| Khalil et al, 2020 (3)              | Unclear                                                                                                                    | No (potential recall bias)                                                                      | Unclear                                                                               | No                                                       | Unclear                                         | Yes                                                                                     | Unclear control for confounders        | Poor                  |
| Piapan et al, 2020 (4)              | Unclear                                                                                                                    | Unclear                                                                                         | Unclear                                                                               | No                                                       | Unclear                                         | Yes                                                                                     | Only controlled for age                | Poor                  |

**Supplement Table 4. Masks for prevention of respiratory virus infections evidence map – Update Alert #3**

| Comparison (intervention A vs. intervention B)                                                                 | SARS-CoV-2 infection* | SARS-CoV-1 or MERS-CoV infection* | Influenza, influenzalike illness, and other viral respiratory illness (excluding pandemic coronaviruses) † |
|----------------------------------------------------------------------------------------------------------------|-----------------------|-----------------------------------|------------------------------------------------------------------------------------------------------------|
| <b>Community setting</b>                                                                                       |                       |                                   |                                                                                                            |
| Mask (type not specified) vs. no mask (k=5 observational studies) (2, 5, 7-9)                                  | ■                     | ◆                                 | -                                                                                                          |
| N95‡ vs. surgical mask in household contacts (k=1 RCT) (10)                                                    | -                     | -                                 | ◆                                                                                                          |
| N95‡ vs. no mask in household contacts (k=1 RCT) (10)                                                          | -                     | -                                 | ◆                                                                                                          |
| Surgical mask vs. no mask in households with an index case and other community settings (k=13 RCTs) (2, 10-21) | ■                     | -                                 | ●                                                                                                          |
| Cloth mask vs. no mask in community contacts (2)                                                               | ■                     |                                   |                                                                                                            |
| <b>Healthcare setting – moderate or higher risk (inpatient)</b>                                                |                       |                                   |                                                                                                            |
| Any mask vs. no mask (k=13 observational studies) (6, 22-33)                                                   | ■                     | ●                                 | -                                                                                                          |
| N95 vs. no mask (k=5 observational studies) (22, 28-30, 34)                                                    | ■                     | ◆                                 | -                                                                                                          |
| Surgical mask vs. no mask (k=7 observational studies) (3, 22, 23, 25, 28, 29, 32)                              | ■                     | ■                                 | -                                                                                                          |
| N95 or surgical mask vs. no mask (k=1 observational study) (33)                                                | -                     | ■                                 | -                                                                                                          |
| Mask (type not specified) vs. no mask (k=5 observational studies) (24, 26, 29, 31, 32)                         | -                     | ◆                                 | -                                                                                                          |
| Cloth mask vs. no mask (k=3 observational studies) (22, 27, 32)                                                | -                     | ■                                 | -                                                                                                          |
| Consistent/always mask use vs. inconsistent mask use (k=5 observational studies) (23, 26, 35, 36)              | ■                     | ◆                                 | -                                                                                                          |

|                                                                                         |   |   |   |
|-----------------------------------------------------------------------------------------|---|---|---|
| N95 vs. surgical mask (k=3 RCTs and 6 observational studies) (4, 22, 23, 28, 33, 37-40) | ■ | ◆ | ● |
| N95 or surgical mask vs. cloth mask (k=3 observational studies) (22, 24, 32)            | - | ■ | - |
| Surgical mask vs. cloth mask (k=1 RCT) (41)                                             | - | - | ◆ |
| <b>Healthcare setting – lower risk (outpatient)</b>                                     |   |   |   |
| N95 vs. surgical mask (k=1 RCT) (42)                                                    | - | - | ● |

\* Only observational evidence was included for these infections

† Only RCT evidence was included for these infections

‡ N95 or equivalent (e.g. P2 mask)

**Strength of evidence**

- Moderate
- ◆ Low
- Insufficient
- No evidence

**Direction of effect**

- ◆ Favors intervention A
- Effects similar or no difference
- No or too little evidence to determine

## References

1. Chou R, Dana T, Jungbauer R, et al. Masks for prevention of respiratory virus infections, including SARS-CoV-2, in health care and community settings: a living rapid review. *Ann Intern Med.* 2020. Epub 2020/06/25. doi: 10.7326/m20-3213. PubMed PMID: 32579379; PubMed Central PMCID: PMC7322812.
2. Doung-Ngern P, Suphanchaimat R, Panjangampatthana A, et al. Case-control study of use of personal protective measures and risk for Severe Acute Respiratory Syndrome Coronavirus 2 infection, Thailand. *Emerg Infect Dis.* 2020;26(11). Epub 2020/09/16. doi: 10.3201/eid2611.203003. PubMed PMID: 32931726.
3. Khalil MM, Alam MM, Arefin MK, et al. Role of personal protective measures in Prevention of COVID-19 spread among physicians in Bangladesh: a multicenter cross-sectional comparative study. *SN Compr Clin Med.* 2020:1-7. Epub 2020/09/10. doi: 10.1007/s42399-020-00471-1. PubMed PMID: 32904377; PubMed Central PMCID: PMC7454131.
4. Piapan L, De Michieli P, Ronchese F, et al. COVID-19 outbreak in healthcare workers in Trieste hospitals (North-Eastern Italy). *J Hosp Infect.* 2020. Epub 2020/08/18. doi: 10.1016/j.jhin.2020.08.012. PubMed PMID: 32805309; PubMed Central PMCID: PMC7427613.
5. Wang Y, Tian H, Zhang L, et al. Reduction of secondary transmission of SARS-CoV-2 in households by face mask use, disinfection and social distancing: a cohort study in Beijing, China. *BMJ Glob Health.* 2020;5(5). Epub 2020/05/30. doi: 10.1136/bmjgh-2020-002794. PubMed PMID: 32467353.
6. Lau JT, Lau M, Kim JH, et al. Probable secondary infections in households of SARS patients in Hong Kong. *Emerg Infect Dis.* 2004c;10(2):235-43. Epub 2004/03/20. doi: 10.3201/eid1002.030626. PubMed PMID: 15030689; PubMed Central PMCID: PMC3322902.
7. Tuan PA, Horby P, Dinh PN, et al. SARS transmission in Vietnam outside of the health-care setting. *Epidemiol Infect.* 2007;135(3):392-401. Epub 2006/07/28. doi: 10.1017/s0950268806006996. PubMed PMID: 16870029; PubMed Central PMCID: PMC2870589.
8. Wu J, Xu F, Zhou W, et al. Risk factors for SARS among persons without known contact with SARS patients, Beijing, China. *Emerg Infect Dis.* 2004;10(2):210-6. doi: 10.3201/eid1002.030730. PubMed PMID: 15030685.
9. MacIntyre CR, Cauchemez S, Dwyer DE, et al. Face mask use and control of respiratory virus transmission in households. *Emerg Infect Dis.* 2009;15(2):233-41. Epub 2009/02/06. doi: 10.3201/eid1502.081167. PubMed PMID: 19193267; PubMed Central PMCID: PMC2662657.
10. Canini L, Andreoletti L, Ferrari P, et al. Surgical mask to prevent influenza transmission in households: a cluster randomized trial. *PLoS One.* 2010;5(11):e13998. Epub 2010/11/26. doi: 10.1371/journal.pone.0013998. PubMed PMID: 21103330; PubMed Central PMCID: PMC2984432.
11. Cowling BJ, Chan KH, Fang VJ, et al. Facemasks and hand hygiene to prevent influenza transmission in households: a cluster randomized trial. *Ann Intern Med.* 2009;151(7):437-46. Epub 2009/08/05. doi: 10.7326/0003-4819-151-7-200910060-00142. PubMed PMID: 19652172.
12. Cowling BJ, Fung RO, Cheng CK, et al. Preliminary findings of a randomized trial of non-pharmaceutical interventions to prevent influenza transmission in households. *PLoS One.* 2008;3(5):e2101. Epub 2008/05/08. doi: 10.1371/journal.pone.0002101. PubMed PMID: 18461182; PubMed Central PMCID: PMC2364646.

13. Larson EL, Ferng YH, Wong-McLoughlin J, et al. Impact of non-pharmaceutical interventions on URIs and influenza in crowded, urban households. *Public Health Rep.* 2010;125(2):178-91. Epub 2010/03/20. doi: 10.1177/003335491012500206. PubMed PMID: 20297744; PubMed Central PMCID: PMC2821845.
14. MacIntyre CR, Zhang Y, Chughtai AA, et al. Cluster randomised controlled trial to examine medical mask use as source control for people with respiratory illness. *BMJ Open.* 2016;6(12):e012330. Epub 2017/01/01. doi: 10.1136/bmjopen-2016-012330. PubMed PMID: 28039289; PubMed Central PMCID: PMC5223715.
15. Simmerman JM, Suntarattiwong P, Levy J, et al. Findings from a household randomized controlled trial of hand washing and face masks to reduce influenza transmission in Bangkok, Thailand. *Influenza Other Respir Viruses.* 2011;5(4):256-67. Epub 2011/06/10. doi: 10.1111/j.1750-2659.2011.00205.x. PubMed PMID: 21651736; PubMed Central PMCID: PMC4634545.
16. Suess T, Remschmidt C, Schink SB, et al. The role of facemasks and hand hygiene in the prevention of influenza transmission in households: results from a cluster randomised trial; Berlin, Germany, 2009-2011. *BMC Infect Dis.* 2012;12:26. Epub 2012/01/28. doi: 10.1186/1471-2334-12-26. PubMed PMID: 22280120; PubMed Central PMCID: PMC3285078.
17. Aiello AE, Murray GF, Perez V, et al. Mask use, hand hygiene, and seasonal influenza-like illness among young adults: a randomized intervention trial. *J Infect Dis.* 2010;201(4):491-8. Epub 2010/01/22. doi: 10.1086/650396. PubMed PMID: 20088690.
18. Aiello AE, Perez V, Coulborn RM, et al. Facemasks, hand hygiene, and influenza among young adults: a randomized intervention trial. *PLoS One.* 2012;7(1):e29744. Epub 2012/02/02. doi: 10.1371/journal.pone.0029744. PubMed PMID: 22295066; PubMed Central PMCID: PMC3266257.
19. Alfelali M, Haworth EA, Barasheed O, et al. Facemask versus no facemask in preventing viral respiratory infections during Hajj: a cluster randomised open label trial March 8, 2019. Available from: [https://papers.ssrn.com/sol3/papers.cfm?abstract\\_id=3349234](https://papers.ssrn.com/sol3/papers.cfm?abstract_id=3349234).
20. Barasheed O, Almasri N, Badahdah AM, et al. Pilot randomised controlled trial to test effectiveness of facemasks in preventing influenza-like illness transmission among Australian Hajj pilgrims in 2011. *Infect Disord Drug Targets.* 2014;14(2):110-6. Epub 2014/10/23. doi: 10.2174/1871526514666141021112855. PubMed PMID: 25336079.
21. Chatterjee P, Anand T, Singh KJ, et al. Healthcare workers & SARS-CoV-2 infection in India: A case-control investigation in the time of COVID-19. *Indian J Med Res.* 2020;151(5):459-67. Epub 2020/07/03. doi: 10.4103/ijmr.IJMR\_2234\_20. PubMed PMID: 32611916.
22. Liu W, Tang F, Fang L-Q, et al. Risk factors for SARS infection among hospital healthcare workers in Beijing: a case control study. *Trop Med Int Health.* 2009;14(s1):52-9. doi: 10.1111/j.1365-3156.2009.02255.x.
23. Loeb M, McGeer A, Henry B, et al. SARS among critical care nurses, Toronto. *Emerging infectious diseases.* 2004;10(2):251-5. Epub 2004/03/20. doi: 10.3201/eid1002.030838. PubMed PMID: 15030692; PubMed Central PMCID: PMC3322898.
24. Ma HJ, Wang HW, Fang LQ, et al. [A case-control study on the risk factors of severe acute respiratory syndromes among health care workers]. *Zhonghua Liu Xing Bing Xue Za Zhi.* 2004;25(9):741-4. Epub 2004/11/24. PubMed PMID: 15555351.



25. Nishiura H, Kuratsuji T, Quy T, et al. Rapid awareness and transmission of severe acute respiratory syndrome in Hanoi French Hospital, Vietnam. *Am J Trop Med Hyg.* 2005;73(1):17-25. Epub 2005/07/15. PubMed PMID: 16014825.
26. Nishiyama A, Wakasugi N, Kirikae T, et al. Risk factors for SARS infection within hospitals in Hanoi, Vietnam. *Jpn J Infect Dis.* 2008;61(5):388-90. Epub 2008/09/23. PubMed PMID: 18806349.
27. Pei LY, Gao ZC, Yang Z, et al. [Investigation of the influencing factors on severe acute respiratory syndrome among health care workers]. *Beijing Da Xue Xue Bao Yi Xue Ban.* 2006;38(3):271-5. Epub 2006/06/17. PubMed PMID: 16778970.
28. Raboud J, Shigayeva A, McGeer A, et al. Risk factors for SARS transmission from patients requiring intubation: a multicentre investigation in Toronto, Canada. *PLoS One.* 2010;5(5):e10717. Epub 2010/05/27. doi: 10.1371/journal.pone.0010717. PubMed PMID: 20502660; PubMed Central PMCID: PMC2873403.
29. Seto WH, Tsang D, Yung RW, et al. Effectiveness of precautions against droplets and contact in prevention of nosocomial transmission of severe acute respiratory syndrome (SARS). *Lancet.* 2003;361(9368):1519-20. Epub 2003/05/10. doi: 10.1016/s0140-6736(03)13168-6. PubMed PMID: 12737864; PubMed Central PMCID: PMC7112437.
30. Teleman MD, Boudville IC, Heng BH, et al. Factors associated with transmission of severe acute respiratory syndrome among health-care workers in Singapore. *Epidemiol Infect.* 2004;132(5):797-803. Epub 2004/10/12. doi: 10.1017/s0950268804002766. PubMed PMID: 15473141; PubMed Central PMCID: PMC2870165.
31. Wilder-Smith A, Teleman MD, Heng BH, et al. Asymptomatic SARS coronavirus infection among healthcare workers, Singapore. *Emerg Infect Dis.* 2005;11(7):1142-5. Epub 2005/07/19. doi: 10.3201/eid1107.041165. PubMed PMID: 16022801; PubMed Central PMCID: PMC3371799.
32. Yin WW, Gao LD, Lin WS, et al. [Effectiveness of personal protective measures in prevention of nosocomial transmission of severe acute respiratory syndrome]. *Zhonghua Liu Xing Bing Xue Za Zhi.* 2004;25(1):18-22. Epub 2004/04/06. PubMed PMID: 15061941.
33. Scales DC, Green K, Chan AK, et al. Illness in intensive care staff after brief exposure to severe acute respiratory syndrome. *Emerg Infect Dis.* 2003;9(10):1205-10. Epub 2003/11/12. doi: 10.3201/eid0910.030525. PubMed PMID: 14609453; PubMed Central PMCID: PMC3033076.
34. Wang X, Pan Z, Cheng Z. Association between 2019-nCoV transmission and N95 respirator use. *J Hosp Infect.* 2020(March 3). doi: 10.1016/j.jhin.2020.02.021.
35. Alraddadi BM, Al-Salmi HS, Jacobs-Slifka K, et al. Risk factors for Middle East respiratory syndrome coronavirus infection among healthcare personnel. *Emerg Infect Dis.* 2016;22(11):1915-20. Epub 2016/10/22. doi: 10.3201/eid2211.160920. PubMed PMID: 27767011; PubMed Central PMCID: PMC5088034.
36. Lau JTF, Fung KS, Wong TW, et al. SARS transmission among hospital workers in Hong Kong. *Emerg Infect Dis.* 2004b;10(2):280-6. doi: 10.3201/eid1002.030534. PubMed PMID: 15030698.
37. Loeb M, Dafoe N, Mahony J, et al. Surgical mask vs N95 respirator for preventing influenza among health care workers: a randomized trial. *JAMA.* 2009;302(17):1865-71. Epub 2009/10/03. doi: 10.1001/jama.2009.1466. PubMed PMID: 19797474.

38. MacIntyre CR, Wang Q, Cauchemez S, et al. A cluster randomized clinical trial comparing fit-tested and non-fit-tested N95 respirators to medical masks to prevent respiratory virus infection in health care workers. *Influenza Other Respir Viruses*. 2011;5(3):170-9. Epub 2011/04/12. doi: 10.1111/j.1750-2659.2011.00198.x. PubMed PMID: 21477136; PubMed Central PMCID: PMC4941587.
39. MacIntyre CR, Wang Q, Seale H, et al. A randomized clinical trial of three options for N95 respirators and medical masks in health workers. *Am J Respir Crit Care Med*. 2013;187(9):960-6. Epub 2013/02/16. doi: 10.1164/rccm.201207-1164OC. PubMed PMID: 23413265.
40. Caputo KM, Byrick R, Chapman MG, et al. Intubation of SARS patients: infection and perspectives of healthcare workers. *Can J Anaesth*. 2006;53(2):122-9. Epub 2006/01/26. doi: 10.1007/bf03021815. PubMed PMID: 16434750.
41. MacIntyre CR, Seale H, Dung TC, et al. A cluster randomised trial of cloth masks compared with medical masks in healthcare workers. *BMJ Open*. 2015;5(4):e006577. Epub 2015/04/24. doi: 10.1136/bmjopen-2014-006577. PubMed PMID: 25903751; PubMed Central PMCID: PMC4420971.
42. Radonovich LJ, Jr., Simberkoff MS, Bessesen MT, et al. N95 Respirators vs medical masks for preventing influenza among health care personnel: a randomized clinical trial. *JAMA*. 2019;322(9):824-33. Epub 2019/09/04. doi: 10.1001/jama.2019.11645. PubMed PMID: 31479137; PubMed Central PMCID: PMC6724169
